# Supplementary material
Source: Springer Nature journal article supplement (https://www.springermedizin.de/resource/supplementary/13075_2012_3603_MOESM12_ESM.pdf/9694898)

Fxop3

Medium

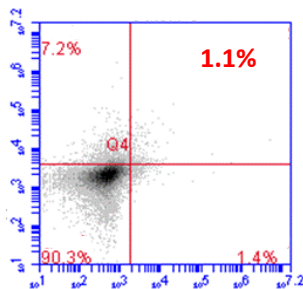

TGF- $\beta$ +IgG

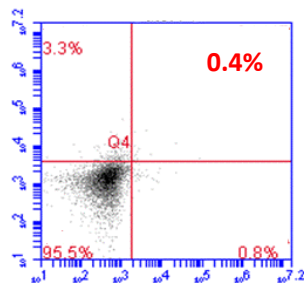

TGF- $\beta$ +CD200Fc

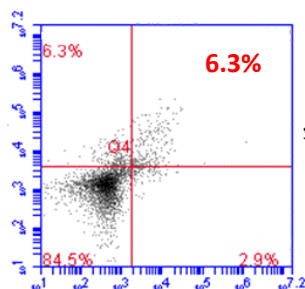

SLE

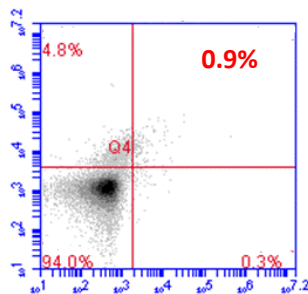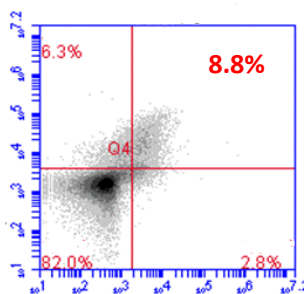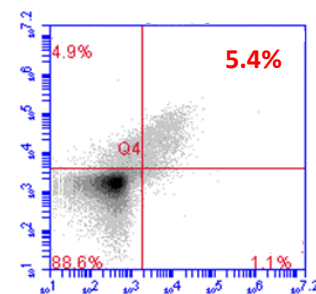

HC

CD25

Supplement: MOESM12 [file 9694898]
